# Supplementary material for: Quantitative assessment of the effect of purity on the properties of single wall carbon nanotubes
Source: Royal Society of Chemistry journal article supplement (doi:10.1039/c4nr07618d), 2015-01-01
Supplement: c4nr07618d1.pdf [file c4nr07618d1.pdf]

Supplemental information (Supplemental Figure)

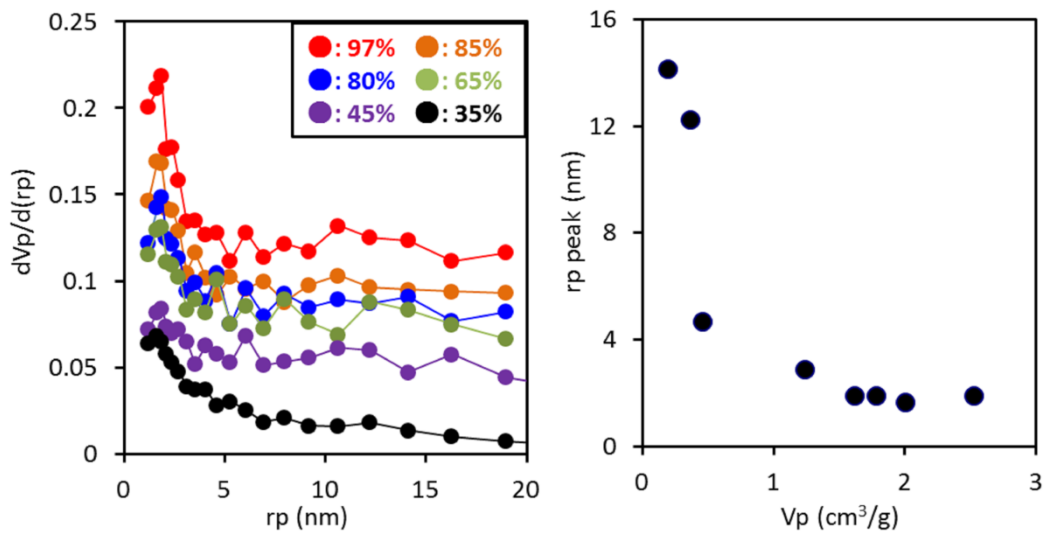

Fig. S1 The pore size distribution estimated by Barrett-Joyner-Halenda (BJH) method from nitrogen adsorption isotherms. The pore size distribution showed a monotonic decrease as the purity decreased.
